# Supplementary material
Source: PubMed Central journal article supplement (PMC2443740)

## Supplementary Information

Figure 1. Bradford assay calibration curves for A. MazE/MazF(His)<sub>6</sub> B. (His)<sub>6</sub>MazE/MazF C. MazF(His)<sub>6</sub> D. (His)<sub>6</sub>MazE. Known amounts of lyophilized protein were resuspended in elution buffer and Bradford assays were performed obtain a relationship between absorbance at 595 nm and protein concentration.

A.

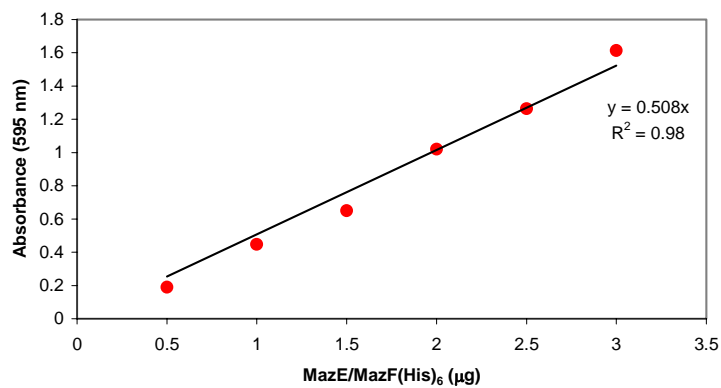

C.

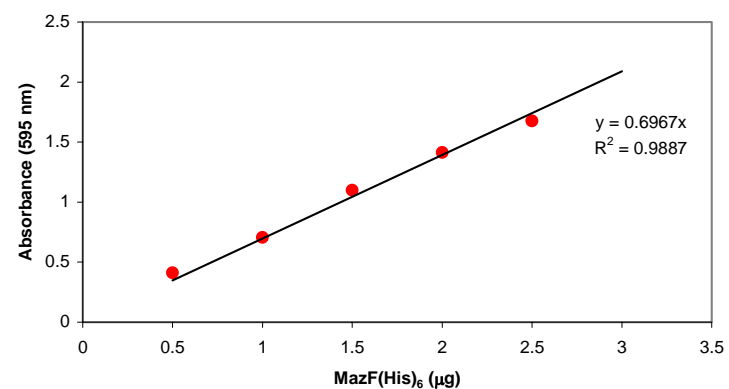

B.

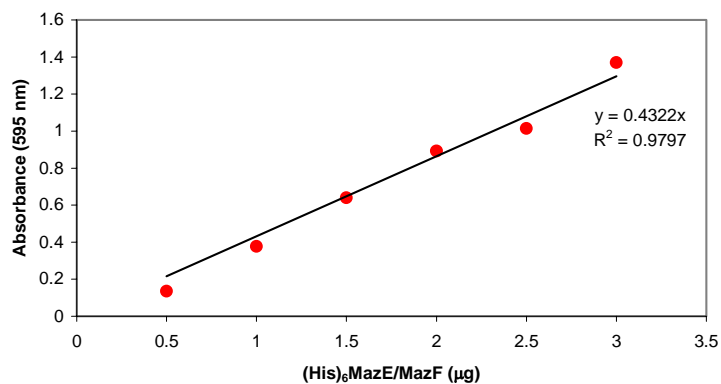

D.

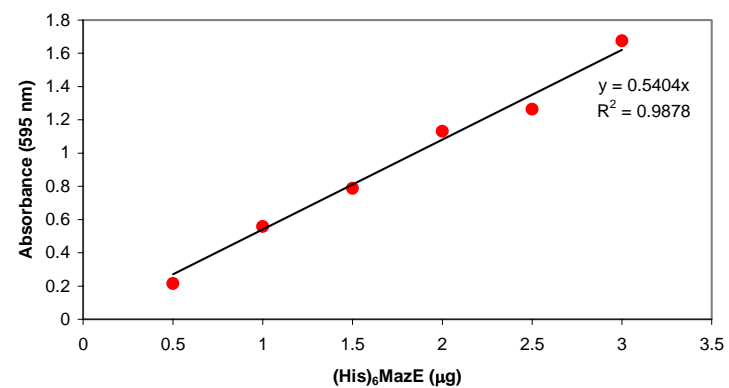

Figure 2. Initial increase in fluorescence observed when reading fluorescence (ex. 485 nm; em. 530 nm) of *A.* 20  $\mu\text{M}$  oligonucleotide in the presence (red) and absence (black) of 3  $\mu\text{M}$  MazF(His)<sub>6</sub> and *B.* of 100 nM 6-FAM alone

*A.*

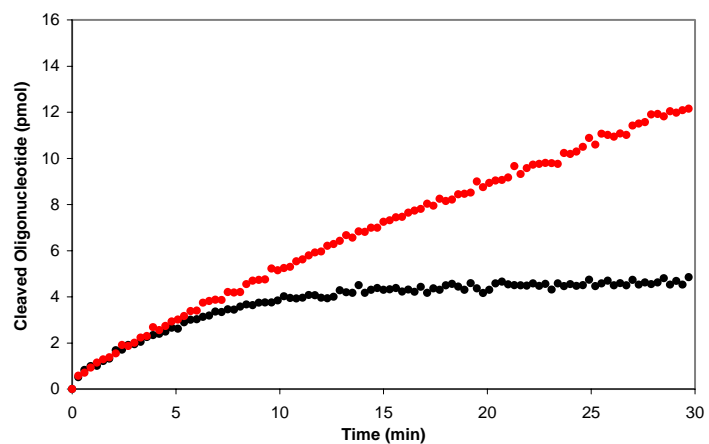

*B.*

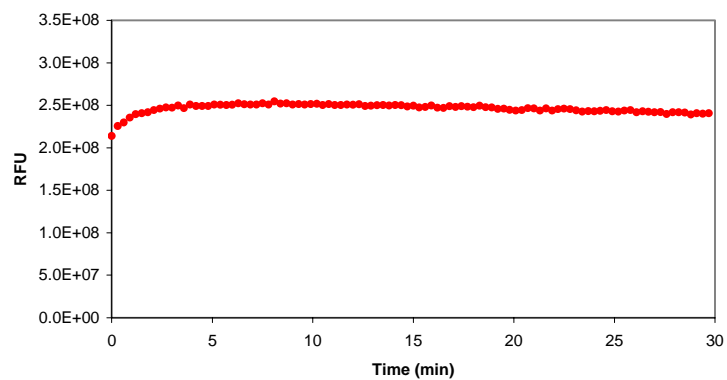

Figure 3. Reaction progress curves for three separate kinetic trials of oligonucleotide cleavage by MazF(His)<sub>6</sub>

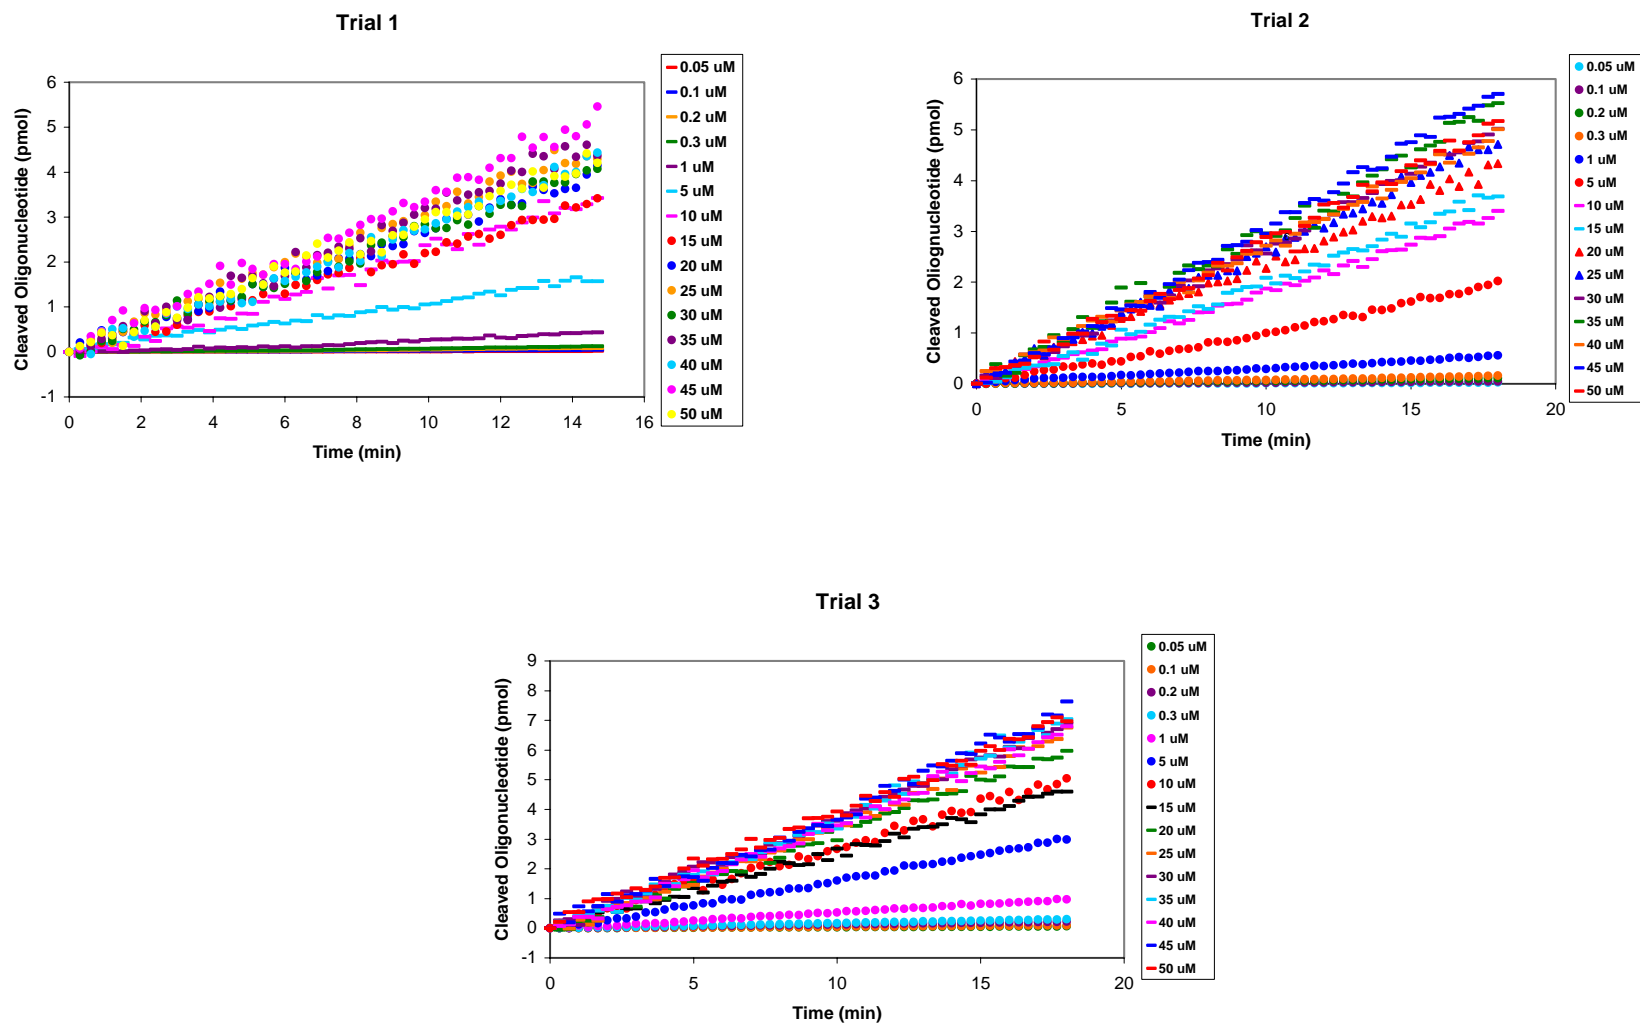

Figure 4. MALDI spectra of reaction products between oligonucleotide substrate and MazF(His)<sub>6</sub> or MazE/MazF(His)<sub>6</sub>. A-C. Mass spectra for HPLC elutions in the reverse order that they came off the column for the reaction between oligonucleotide substrate and MazF(His)<sub>6</sub>. The spectrum in A corresponds to the small amount of unprocessed oligonucleotide that remains, as shown in Figure 4 of the manuscript. D. Mass spectrum for HPLC elution forming single peak in reaction of oligonucleotide with MazE/MazF(His)<sub>6</sub>.

A.

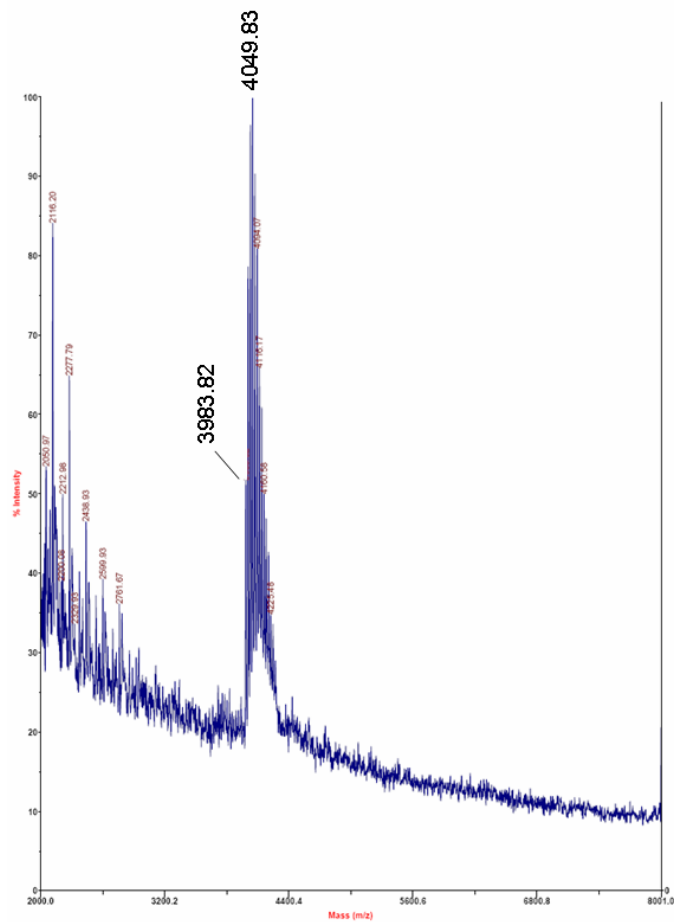

C.

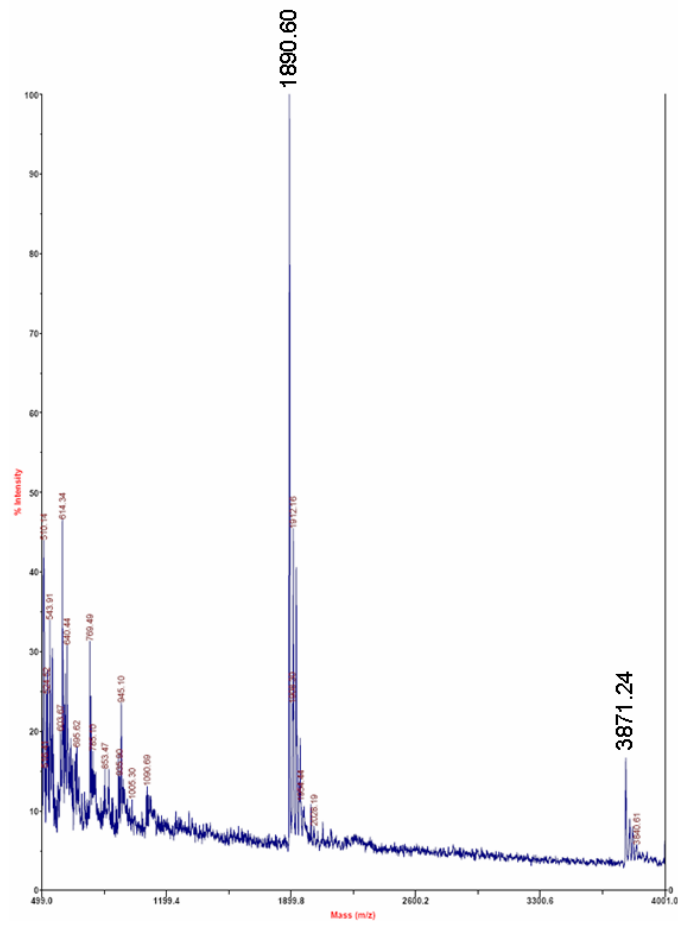

D.

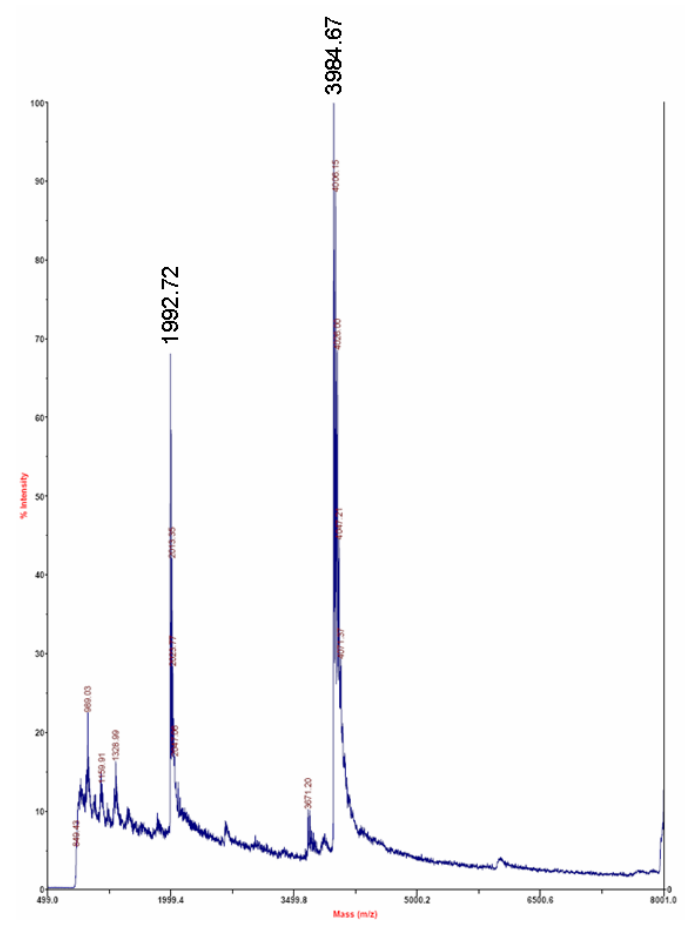

Supplement: NIHMS34240-supplement-01.pdf [file NIHMS34240-supplement-01.pdf]
